# Supplementary material for: Genetic Variants of the TERT Gene, Telomere Length, and Circulating TERT as Prognostic Markers in Rectal Cancer Patients
Source: PubMed Central journal article supplement (PMC7692334; doi:10.3390/cancers12113115), 2020-10-25
Supplement: cancers-12-03115-s001.pdf [file cancers-12-03115-s001.pdf]

# Supplementary Materials: Genetic Variants of the *TERT* Gene, Telomere Length, and Circulating *TERT* as Prognostic Markers in Rectal Cancer Patients

Enrica Rampazzo, Erika Cecchin, Paola Del Bianco, Chiara Menin, Gaya Spolverato, Silvia Giunco, Sara Lonardi, Sandro Malacrida, Antonino De Paoli, Giuseppe Toffoli, Salvatore Pucciarelli and Anita De Rossi

**Table S1A.** Association between SNP genotypes and RTL in peripheral blood cells after neoadjuvant therapy.

| SNP              | Genotype | n  | RTL median (IQR)    | p-value *    |
|------------------|----------|----|---------------------|--------------|
| <b>rs2736108</b> | TT       | 8  | 1.05 (0.95 to 1.14) | <i>Ref</i>   |
|                  | TC       | 27 | 1.17 (1.00 to 1.36) | 0.167        |
|                  | CC       | 36 | 1.13 (1.03 to 1.28) | 0.238        |
| rs2735940        | GG       | 15 | 1.09 (1.00 to 1.31) | <i>Ref</i>   |
|                  | AG       | 31 | 1.15 (1.05 to 1.29) | 0.526        |
|                  | AA       | 13 | 1.06 (0.96 to 1.16) | 0.390        |
| rs2736098        | TT       | 4  | 1.01 (0.95 to 1.08) | <i>Ref</i>   |
|                  | TC       | 19 | 1.15 (1.00 to 1.26) | 0.258        |
|                  | CC       | 49 | 1.15 (1.03 to 1.28) | 0.166        |
| rs2736100        | CC       | 19 | 1.06 (0.95 to 1.21) | <i>Ref</i>   |
|                  | AC       | 34 | 1.15 (1.09 to 1.28) | 0.277        |
|                  | AA       | 17 | 1.11 (1.02 to 1.32) | 0.530        |
| rs35241335       | TT       | 67 | 1.14 (0.99 to 1.26) | <i>Ref</i>   |
|                  | TG       | 5  | 1.28 (1.27 to 1.30) | <b>0.039</b> |
|                  | GG       | 1  | 1.41                | 0.134        |
| rs11742908       | CC       | 40 | 1.16 (1.03 to 1.32) | <i>Ref</i>   |
|                  | CG       | 23 | 1.15 (0.95 to 1.26) | 0.191        |
|                  | GG       | 2  | 1.11 (1.11 to 1.12) | 0.651        |
| rs2736122        | GG       | 45 | 1.15 (1.05 to 1.30) | <i>Ref</i>   |
|                  | AG       | 25 | 1.10 (0.96 to 1.21) | 0.240        |
|                  | AA       | 2  | 1.20 (1.05 to 1.36) | 0.733        |
| rs2853690        | GG       | 50 | 1.14 (1.00 to 1.28) | 0.350        |
|                  | AG       | 18 | 1.09 (0.97 to 1.21) | <i>Ref</i>   |
|                  | AA       | 2  | 1.20 (1.05 to 1.36) | 0.430        |

RTL = relative telomere length; IQR= interquartile range; \* adjusted by age.

**Table S1B.** Association between SNP genotypes and RTL changes after neoadjuvant therapy.

| SNP              | Genotype | n  | $\Delta$ RTL<br>(T2-T0)<br>median (IQR) | p-value *    |
|------------------|----------|----|-----------------------------------------|--------------|
| <b>rs2736108</b> | TT       | 8  | -0.35 (-0.65 to 0.20)                   | <i>Ref</i>   |
|                  | TC       | 27 | -0.04 (-0.29 to 0.16)                   | 0.171        |
|                  | CC       | 36 | 0.17 (-0.11 to 0.29)                    | <b>0.020</b> |
| rs2735940        | GG       | 15 | 0.17 (-0.05 to 0.32)                    | <i>Ref</i>   |
|                  | AG       | 31 | 0.02 (-0.12 to 0.33)                    | 0.535        |
|                  | AA       | 13 | -0.33 (-0.68 to 0.26)                   | <b>0.008</b> |
| rs2736098        | TT       | 4  | -0.18 (-0.65 to 0.20)                   | <i>Ref</i>   |
|                  | TC       | 19 | -0.09 (-0.33 to 0.29)                   | 0.395        |
|                  | CC       | 49 | 0.10 (-0.13 to 0.26)                    | 0.215        |
| rs2736100        | CC       | 19 | -0.15 (-0.49 to 0.10)                   | <i>Ref</i>   |
|                  | AC       | 34 | 0.16 (-0.13 to 0.36)                    | <b>0.006</b> |

|            |    |    |                        |              |
|------------|----|----|------------------------|--------------|
|            | AA | 17 | 0.17 (0.00 to 0.24)    | <b>0.007</b> |
| rs35241335 | TT | 67 | 0.00 (-0.22 to 0.26)   | <i>Ref</i>   |
|            | TG | 5  | 0.26 (0.15 to 0.33)    | 0.379        |
|            | GG | 1  | 0.35                   | 0.381        |
| rs11742908 | CC | 40 | 0.13 (-0.14 to 0.26)   | <i>Ref</i>   |
|            | CG | 23 | -0.10 (-0.35 to 0.27)  | 0.276        |
|            | GG | 2  | 0.12 (0.003 to 0.25)   | 0.803        |
| rs2736122  | GG | 45 | 0.01 (-0.32 to 0.26)   | <i>Ref</i>   |
|            | AG | 25 | 0.1 (-0.15 to 0.26)    | 0.793        |
|            | AA | 2  | -0.04 (-0.07 to -0.02) | 0.922        |
| rs2853690  | GG | 50 | 0.01 (-0.33 to 0.26)   | 0.552        |
|            | AG | 18 | 0.11 (-0.13 to 0.28)   | <i>Ref</i>   |
|            | AA | 2  | -0.04 (-0.07 to -0.02) | 0.852        |

RTL = relative telomere length; IQR= interquartile range; \* adjusted by age.

**Table S2A.** Association between SNP genotypes and *TERT* levels after neoadjuvant therapy.

| SNP        | Genotype | n   | <i>TERT</i> median (IQR) | <i>p</i> -value |
|------------|----------|-----|--------------------------|-----------------|
| rs2736108  | TT       | 12  | 135.5 (82.5 to 226.2)    | <i>Ref</i>      |
|            | TC       | 42  | 37.5 (0.0 to 142.2)      | 0.069           |
|            | CC       | 61  | 40.0 (0.0 to 177.0)      | 0.088           |
| rs2735940  | GG       | 28  | 85.0 (0.0 to 184.0)      | <i>Ref</i>      |
|            | AG       | 49  | 30.0 (0.0 to 167.0)      | 0.468           |
|            | AA       | 26  | 49.5 (0.0 to 183.0)      | 0.889           |
| rs2736098  | TT       | 9   | 122.0 (0.0 to 226.0)     | <i>Ref</i>      |
|            | TC       | 31  | 53.0 (0.0 to 143.0)      | 0.360           |
|            | CC       | 77  | 35.0 (0.0 to 177.0)      | 0.339           |
| rs2736100  | CC       | 30  | 49.5 (0.0 to 174.5)      | <i>Ref</i>      |
|            | AC       | 56  | 32.5 (0.0 to 152.7)      | 0.82            |
|            | AA       | 26  | 85.0 (0.0 to 188.0)      | 0.643           |
| rs35241335 | TT       | 108 | 53.5 (0.0 to 177.7)      | <i>Ref</i>      |
|            | TG       | 10  | 0.0 (0.0 to 35.5)        | 0.230           |
|            | GG       | 1   | 90.0                     | 0.986           |
| rs11742908 | CC       | 57  | 40.0 (0.0 to 167.0)      | <i>Ref</i>      |
|            | CG       | 53  | 55.0 (0.0 to 177.0)      | 0.659           |
|            | GG       | 2   | 0.0 (0.0 to 0.0)         | 0.287           |
| rs2736122  | GG       | 71  | 42.0 (0.0 to 154.0)      | <i>Ref</i>      |
|            | AG       | 43  | 45.0 (0.0 to 218.5)      | 0.437           |
|            | AA       | 5   | 0.0 (0.0 to 144.0)       | 0.672           |
| rs2853690  | GG       | 80  | 25.0 (0.0 to 134.2)      | <b>0.016</b>    |
|            | AG       | 30  | 131.0 (0.0 to 229.5)     | <i>Ref</i>      |
|            | AA       | 4   | 0.0 (0.0 to 36.0)        | 0.108           |

IQR= interquartile range

**Table S2B.** Association between SNP genotypes and *TERT* changes after neoadjuvant therapy.

| SNP       | Genotype | n  | $\Delta$ <i>TERT</i> (T2-T0) median (IQR) | <i>p</i> -value |
|-----------|----------|----|-------------------------------------------|-----------------|
| rs2736108 | TT       | 12 | 7.5 (-223.5 to 138.7)                     | <i>Ref</i>      |
|           | TC       | 42 | 0.0 (-178.5 to 59.2)                      | 0.856           |
|           | CC       | 60 | 0.0 (-117.7 to 27.0)                      | 0.844           |
| rs2735940 | GG       | 28 | 0.0 (-96.2 to 72.5)                       | <i>Ref</i>      |
|           | AG       | 48 | 0.0 (-157.7 to 20.0)                      | 0.441           |
|           | AA       | 26 | -97.5 (-206.2 to 134.7)                   | 0.425           |
| rs2736098 | TT       | 9  | -87.0 (-183.0 to 133.0)                   | <i>Ref</i>      |
|           | TC       | 31 | 0.0 (-176.0 to 113.0)                     | 0.932           |
|           | CC       | 76 | 0.0 (-117.7 to 20.5)                      | 0.943           |
| rs2736100 | CC       | 30 | -38.0 (-198.0 to 9.0)                     | <i>Ref</i>      |
|           | AC       | 55 | 0.0 (-133.0 to 78.0)                      | 0.414           |
|           | AA       | 26 | 0.0 (-123.2 to 33.7)                      | 0.751           |

|            |    |     |                          |            |
|------------|----|-----|--------------------------|------------|
| rs35241335 | TT | 107 | 0.0 (-128.5 to 56.0)     | <i>Ref</i> |
|            | TG | 10  | -105.0 (-211.7 to -15.5) | 0.092      |
|            | GG | 1   | -95.0                    | 0.676      |
| rs11742908 | CC | 56  | 0.0 (-207.5 to 23.0)     | <i>Ref</i> |
|            | CG | 53  | 0.0 (-126.0 to 101.0)    | 0.162      |
|            | GG | 2   | 0.0 (0.0 to 0.0)         | 0.602      |
| rs2736122  | GG | 70  | 0.0 (-103.7 to 90.2)     | <i>Ref</i> |
|            | AG | 43  | -5.0 (-225.0 to 11.0)    | 0.126      |
|            | AA | 5   | 0.0 (-415.0 to 95.0)     | 0.683      |
| rs2853690  | GG | 79  | 0.0 (-160.5 to 54.0)     | 0.463      |
|            | AG | 30  | 0.0 (-57.5 to 33.7)      | <i>Ref</i> |
|            | AA | 4   | -207.5 (-435.0 to 23.7)  | 0.066      |

IQR= interquartile range

**Table S3A.** Univariate logistic regression analysis of clinical and demographical characteristics according to TRG probability in rectal cancer patients.

| Characteristics              |               | TRG 1-2 (%)<br>(n = 90) | TRG 3-5 (%)<br>(n = 104) | OR<br>TRG 1-2 vs TRG 3-5<br>(95% CI) | <i>p</i> -value |
|------------------------------|---------------|-------------------------|--------------------------|--------------------------------------|-----------------|
| Age (years)                  | cont.         |                         |                          | 1.03 (1–1.06)                        | <b>0.043</b>    |
| Gender                       | M             | 65 (72.2)               | 73 (70.2)                | 1.1 (0.6–2.1)                        | 0.756           |
|                              | F             | 25 (27.8)               | 31 (29.8)                | <i>Ref</i>                           |                 |
| Distance from anal verge(cm) | Median (IQR)  | 5 (3–8)                 | 5 (4–8)                  | 0.95 (0.85–1.06)                     | 0.369           |
| CEA, ng/ml (T0)              | Median (IQR)  | 2.0 (1.0–3.1)           | 2.2 (1.2–4.0)            | 1.0 (0.96–1.03)                      | 0.828           |
| Grading                      | G1            | 3 (4.5)                 | 9 (10.1)                 | <i>Ref</i>                           |                 |
|                              | G2            | 59 (88.1)               | 73 (82.0)                | 2.4 (0.6–9.4)                        | 0.199           |
|                              | G3            | 5 (7.5)                 | 7 (7.9)                  | 2.1 (0.4–12.2)                       | 0.390           |
| cTNM                         | I             | 5 (5.7)                 | 1 (1.0)                  | <i>Ref</i>                           |                 |
|                              | II            | 11 (12.5)               | 10 (9.9)                 | 0.2 (0.0–2.2)                        | 0.199           |
|                              | III           | 70 (79.5)               | 89 (88.1)                | 0.2 (0.0–1.4)                        | 0.095           |
|                              | IV            | 2 (2.3)                 | 1 (1.0)                  | 0.4 (0.0–10.0)                       | 0.577           |
| Total RT dose                | <50.4 Gy      | 10 (12.5)               | 12 (12.2)                | <i>Ref</i>                           |                 |
|                              | 50.4 Gy       | 42 (52.5)               | 47 (48.0)                | 1.1 (0.4–2.7)                        | 0.884           |
|                              | >50.4 Gy      | 28 (35.0)               | 39 (39.8)                | 0.9 (0.3–2.3)                        | 0.763           |
| Fluoropyrimide               | Alone         | 44 (53.7)               | 49 (48.5)                | <i>Ref</i>                           |                 |
|                              | + other drugs | 36 (43.9)               | 48 (47.5)                | 0.8 (0.5–1.5)                        | 0.552           |
|                              | No            | 2 (2.4)                 | 4 (4.0)                  | 0.6 (0.1–3.2)                        | 0.511           |

OR = odds ratio; TRG = tumor regression grade; CI = confidence interval; cont. = continuous variable; CEA = carcinoembryonic antigen; cTNM = clinical Tumor, Node, Metastasis classification; RT= radiotherapy.

**Table S3B.** Univariate logistic regression analysis of covariates of interest according to TRG probability in rectal cancer patients.

|           |    | TRG 1-2 (%) | TRG 3-5 (%) | OR<br>TRG 1-2 vs TRG 3-5<br>(95% CI) | <i>p</i> -value |
|-----------|----|-------------|-------------|--------------------------------------|-----------------|
| rs2736108 | TT | 3 (3.4)     | 13 (13.3)   | <i>Ref</i>                           |                 |
|           | TC | 29 (33.0)   | 35 (35.7)   | 3.6 (0.9–13.8)                       | 0.063           |
|           | CC | 56 (63.6)   | 50 (51.0)   | 4.8 (1.3–18.0)                       | <b>0.018</b>    |
| rs2735940 | AA | 13 (16.5)   | 25 (28.1)   | <i>Ref</i>                           |                 |
|           | AG | 40 (50.6)   | 44 (49.4)   | 1.7 (0.8–3.9)                        | 0.169           |
|           | GG | 26 (32.9)   | 20 (22.5)   | 2.5 (1.0–6.1)                        | <b>0.043</b>    |
| rs2736098 | TT | 2 (2.2)     | 10 (10.1)   | <i>Ref</i>                           |                 |
|           | TC | 22 (24.7)   | 29 (29.3)   | 3.8 (0.7–19.1)                       | 0.106           |
|           | CC | 65 (73.0)   | 60 (60.6)   | 5.4 (1.1–25.7)                       | <b>0.034</b>    |
| rs2736100 | CC | 18 (21.4)   | 26 (26.5)   | <i>Ref</i>                           | <i>Ref</i>      |
|           | AC | 44 (52.4)   | 51 (52.0)   | 1.2 (0.6–2.6)                        | 0.551           |

|                       |                      |           |           |                 |                  |
|-----------------------|----------------------|-----------|-----------|-----------------|------------------|
|                       | AA                   | 22 (26.2) | 21 (21.4) | 1.5 (0.7–3.5)   | 0.338            |
| rs35241335            | TT                   | 80 (88.9) | 89 (89.0) | <i>Ref</i>      |                  |
|                       | TG                   | 9 (10.0)  | 11 (11.0) | 0.9 (0.4–2.3)   | 0.843            |
|                       | GG                   | 1 (1.1)   | 0 (0)     |                 |                  |
|                       |                      |           |           |                 |                  |
| rs11742908            | CC                   | 49 (57.0) | 54 (57.4) | <i>Ref</i>      |                  |
|                       | CG                   | 35 (40.7) | 38 (40.4) | 1.0 (0.6–1.9)   | 0.961            |
|                       | GG                   | 2 (2.3)   | 2 (2.1)   | 1.1 (0.2–8.1)   | 0.924            |
| rs2736122             | GG                   | 49 (58.3) | 61 (60.4) | <i>Ref</i>      |                  |
|                       | AG                   | 29 (34.5) | 36 (35.6) | 1.0 (0.5–1.9)   | 0.993            |
|                       | AA                   | 6 (7.1)   | 4 (4.0)   | 1.9 (0.5–7.0)   | 0.354            |
| rs2853690             | GG                   | 64 (73.6) | 65 (67.0) | 1.9 (0.9–3.7)   | 0.085            |
|                       | AG                   | 16 (18.4) | 30 (30.9) | <i>Ref</i>      |                  |
|                       | AA                   | 7 (8.0)   | 2 (2.1)   | 6.6 (1.2–35.4)  | <b>0.029</b>     |
| RTL (T0)              | ≤median (1.055)      | 45 (50.0) | 52 (50.0) | <i>Ref</i>      |                  |
|                       | >median              | 45 (50.0) | 52 (50.0) | 1.0 (0.6–1.8)   | 1.000            |
| RTL (T2)              | ≤median (1.14)       | 14 (43.8) | 24 (57.1) | <i>Ref</i>      |                  |
|                       | >median              | 18 (56.2) | 18 (42.9) | 1.7 (0.7–4.3)   | 0.255            |
| ΔRTL (T2-T0)          | ≤0 (stable/decrease) | 17 (53.1) | 18 (42.9) | <i>Ref</i>      |                  |
|                       | >0 (increase)        | 15 (46.9) | 24 (57.1) | 0.7 (0.3–1.7)   | 0.382            |
| <i>TERT</i> (T0)      | ≤median (122)        | 29 (50.0) | 43 (50.6) | <i>Ref</i>      |                  |
|                       | >median              | 29 (50.0) | 42 (49.4) | 1.0 (0.5–3.0)   | 0.945            |
| <i>TERT</i> (T2)      | ≤median (45)         | 40 (76.9) | 22 (31.0) | 7.4 (3.3–16.8)  | <b>&lt;0.001</b> |
|                       | >median              | 12 (23.1) | 49 (69.0) | <i>Ref</i>      |                  |
| Δ <i>TERT</i> (T2-T0) | ≤0 (stable/decrease) | 46 (90.2) | 33 (46.5) | 10.6 (3.8–29.8) | <b>&lt;0.001</b> |
|                       | >0 (increase)        | 5 (9.8)   | 38 (53.5) | <i>Ref</i>      |                  |

RTL = relative telomere length; TRG = tumor regression grade; OR = odds ratio; CI = confidence interval.

**Table S4A.** Haplotype distribution in responder (TRG 1-2) and non-responders (TRG 3-5) to CRT.

| SNP<br>Haplotype id | rs2736108 | rs2735940 | rs2736098 | rs2736100 | rs35241335 | rs11742908 | rs2736122 | rs2853690 | TRG 1-2 % * | TRG 3-5 % * | OR*                            |             | <i>p</i> -value† |
|---------------------|-----------|-----------|-----------|-----------|------------|------------|-----------|-----------|-------------|-------------|--------------------------------|-------------|------------------|
|                     |           |           |           |           |            |            |           |           |             |             | TRG 1-2 vs TRG 3-5<br>(95% CI) |             |                  |
| 1                   | C         | G         | C         | A         | T          | C          | G         | G         | 0.22        | 0.15        | 1                              | ---         |                  |
| 2                   | C         | G         | C         | A         | T          | C          | A         | A         | 0.11        | 0.13        | 0.93 (0.39–2.22)               | 0.87        |                  |
| 3                   | T         | A         | T         | C         | T          | C          | G         | G         | 0.07        | 0.14        | 0.45 (0.14–1.49)               | 0.19        |                  |
| 4                   | C         | A         | C         | C         | T          | C          | G         | G         | 0.09        | 0.11        | 0.90 (0.31–2.61)               | 0.85        |                  |
| 5                   | C         | A         | C         | C         | T          | G          | G         | G         | 0.05        | 0.07        | 0.65 (0.21–2.04)               | 0.47        |                  |
| 6                   | T         | A         | C         | C         | T          | C          | G         | G         | 0.06        | 0.07        | 1.05 (0.33–3.31)               | 0.93        |                  |
| 7                   | C         | G         | C         | A         | T          | G          | G         | G         | 0.05        | 0.06        | 1.08 (0.27–4.40)               | 0.91        |                  |
| 8                   | C         | G         | C         | A         | G          | C          | G         | G         | 0.05        | 0.04        | 1.41 (0.44–4.48)               | 0.56        |                  |
| 9                   | C         | G         | C         | C         | T          | C          | G         | G         | 0.03        | 0.04        | 1.13 (0.20–6.48)               | 0.89        |                  |
| <b>10</b>           | <b>C</b>  | <b>G</b>  | <b>C</b>  | <b>A</b>  | <b>T</b>   | <b>C</b>   | <b>A</b>  | <b>G</b>  | <b>0.04</b> | <b>0.01</b> | <b>6.80 (1.04–44.41)</b>       | <b>0.05</b> |                  |
| 11                  | T         | A         | T         | C         | T          | G          | G         | G         | 0.06        | 0.01        | 1.26 (0.18–8.62)               | 0.82        |                  |
| 12                  | C         | G         | C         | C         | T          | G          | G         | G         | 0.03        | 0.02        | 10.18 (0.00–20844.24)          | 0.55        |                  |
| rare                | *         | *         | *         | *         | *          | *          | *         | *         | NA          | NA          | 0.83 (0.36–1.87)               | 0.65        |                  |

\* frequencies are estimated by SNPStats program; TRG = tumor regression grade; OR = odd ratio; CI= confidence interval; † adjusted by age

**Table S4B.** 5' *TERT* gene haplotype distribution in responders (TRG 1-2) and non-responders (TRG 3-5) to CRT.

| SNP Haplotype id | rs2736108 | rs2735940 | rs2736098 | TRG 1-2* %  | TRG 3-5* %  | OR* TRG 1-2 vs TRG 3-5 (95% CI) | <i>p</i> -value† |
|------------------|-----------|-----------|-----------|-------------|-------------|---------------------------------|------------------|
| 1                | C         | G         | C         | 0.59        | 0.46        | 1                               | ---              |
| 2                | C         | A         | C         | 0.19        | 0.21        | 0.69 (0.38–1.27)                | 0.24             |
| <b>3</b>         | <b>T</b>  | <b>A</b>  | <b>T</b>  | <b>0.13</b> | <b>0.24</b> | <b>0.45 (0.26–0.80)</b>         | <b>0.007</b>     |
| 4                | T         | A         | C         | 0.07        | 0.08        | 0.74 (0.33–1.64)                | 0.46             |
| rare             | *         | *         | *         | NA          | NA          | 1.98 (0.20–19.52)               | 0.56             |

\* frequencies are estimated by SNPStats program; TRG= tumor regression grade; OR= odd ratio; CI= confidence interval; † adjusted by age.

Table S5. Univariate Cox regression analysis of EFS.

|                          |                      | E/N    | HR (95%CI)       | p-value      |
|--------------------------|----------------------|--------|------------------|--------------|
| Age at diagnosis (years) | cont.                |        | 1.00 (0.98–1.03) | 0.934        |
| Gender                   | M                    | 45/136 | 1.0 (0.6–1.7)    | 0.955        |
|                          | F                    | 19/56  | Ref              |              |
| rs2736108                | CC                   | 36/104 | Ref              |              |
|                          | TC                   | 20/64  | 0.9 (0.5–1.5)    | 0.668        |
|                          | TT                   | 6/16   | 1.1 (0.5–2.6)    | 0.806        |
| rs2735940                | GG                   | 13/44  | Ref              |              |
|                          | AG                   | 33/84  | 1.3 (0.7–2.4)    | 0.444        |
|                          | AA                   | 11/38  | 0.9 (0.4–2.1)    | 0.901        |
| rs2736098                | CC                   | 43/123 | Ref              |              |
|                          | TC                   | 15/51  | 0.8 (0.5–1.5)    | 0.524        |
|                          | TT                   | 3/12   | 0.7 (0.2–2.4)    | 0.619        |
| rs2736100                | CC                   | 18/44  | Ref              |              |
|                          | AC                   | 31/94  | 0.7 (0.4–1.3)    | 0.291        |
|                          | AA                   | 12/42  | 0.6 (0.3–1.3)    | 0.236        |
| rs35241335               | TT                   | 59/168 | Ref              |              |
|                          | TG                   | 3/19   | 0.4 (0.1–1.3)    | 0.128        |
|                          | GG                   | 0/1    |                  |              |
| rs11742908               | CC                   | 34/103 | Ref              |              |
|                          | CG                   | 22/71  | 0.9 (0.5–1.5)    | 0.679        |
|                          | GG                   | 2/4    | 1.5 (0.4–6.4)    | 0.554        |
| rs2736122                | GG                   | 36/108 | Ref              |              |
|                          | AG                   | 22/65  | 1.0 (0.6–1.6)    | 0.878        |
|                          | AA                   | 3/10   | 0.7 (0.2–2.4)    | 0.606        |
| rs2853690                | GG                   | 36/127 | 0.7 (0.4–1.1)    | 0.134        |
|                          | AG                   | 19/46  | Ref              |              |
|                          | AA                   | 3/9    | 0.7 (0.2–2.5)    | 0.631        |
| RTL (T0)                 | ≤median (1.055)      | 29/95  | Ref              |              |
|                          | >median              | 35/97  | 1.1 (0.7–1.8)    | 0.670        |
| RTL (T2)                 | ≤median (1.14)       | 17/38  | Ref              |              |
|                          | >median              | 7/36   | 0.4 (0.1–0.9)    | <b>0.026</b> |
| ΔRTL (T2-T0)             | ≤0 (stable/decrease) | 16/35  | Ref              |              |
|                          | >0 (increase)        | 8/39   | 0.4 (0.2–1.0)    | <b>0.049</b> |
| TERT (T0)                | ≤median (122)        | 18/70  | Ref              |              |
|                          | >median              | 26/71  | 1.5 (0.8–2.8)    | 0.171        |
| TERT (T2)                | ≤median (45)         | 12/62  | 0.4 (0.2–0.8)    | <b>0.012</b> |
|                          | >median              | 25/60  | Ref              |              |
| ΔTERT (T2-T0)            | ≤0 (stable/decrease) | 19/79  | 0.4 (0.2–0.9)    | <b>0.016</b> |
|                          | >0 (increase)        | 18/42  | Ref              |              |

EFS = Event –free Survival; HR = hazard ratio; cont. = continuous variable; CI = Confidence Interval; RTL = relative telomere length.

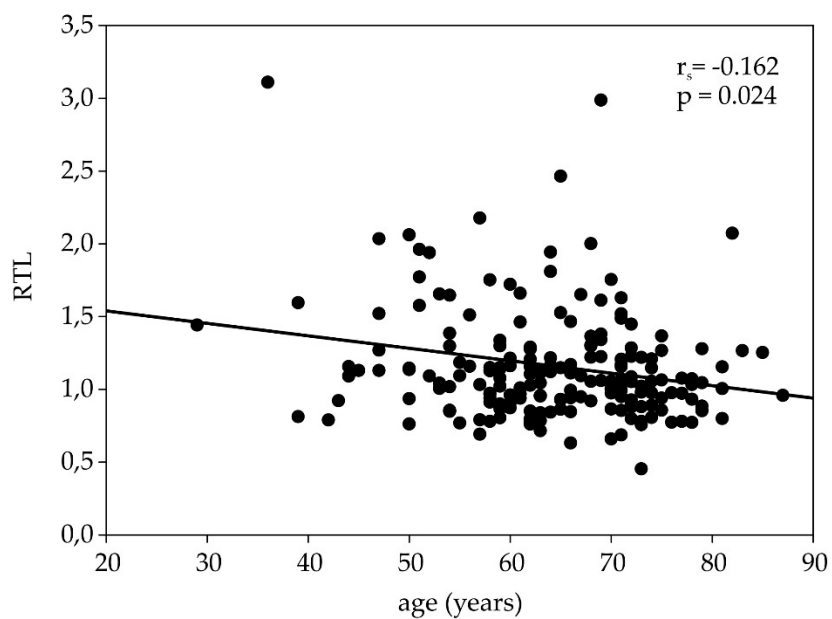

**Figure S1.** Correlation between age and telomere length in peripheral blood cells of rectal cancer patients.

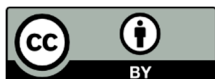

© 2020 by the authors. Licensee MDPI, Basel, Switzerland. This article is an open access article distributed under the terms and conditions of the Creative Commons Attribution (CC BY) license (<http://creativecommons.org/licenses/by/4.0/>).
